# Supplementary material for: Low tristetraprolin expression activates phenotypic plasticity and primes transition to lethal prostate cancer in mice
Source: JCI journal article supplement (doi:10.1172/jci175680), 2024-11-19

Uncropped gel

Figure S5D

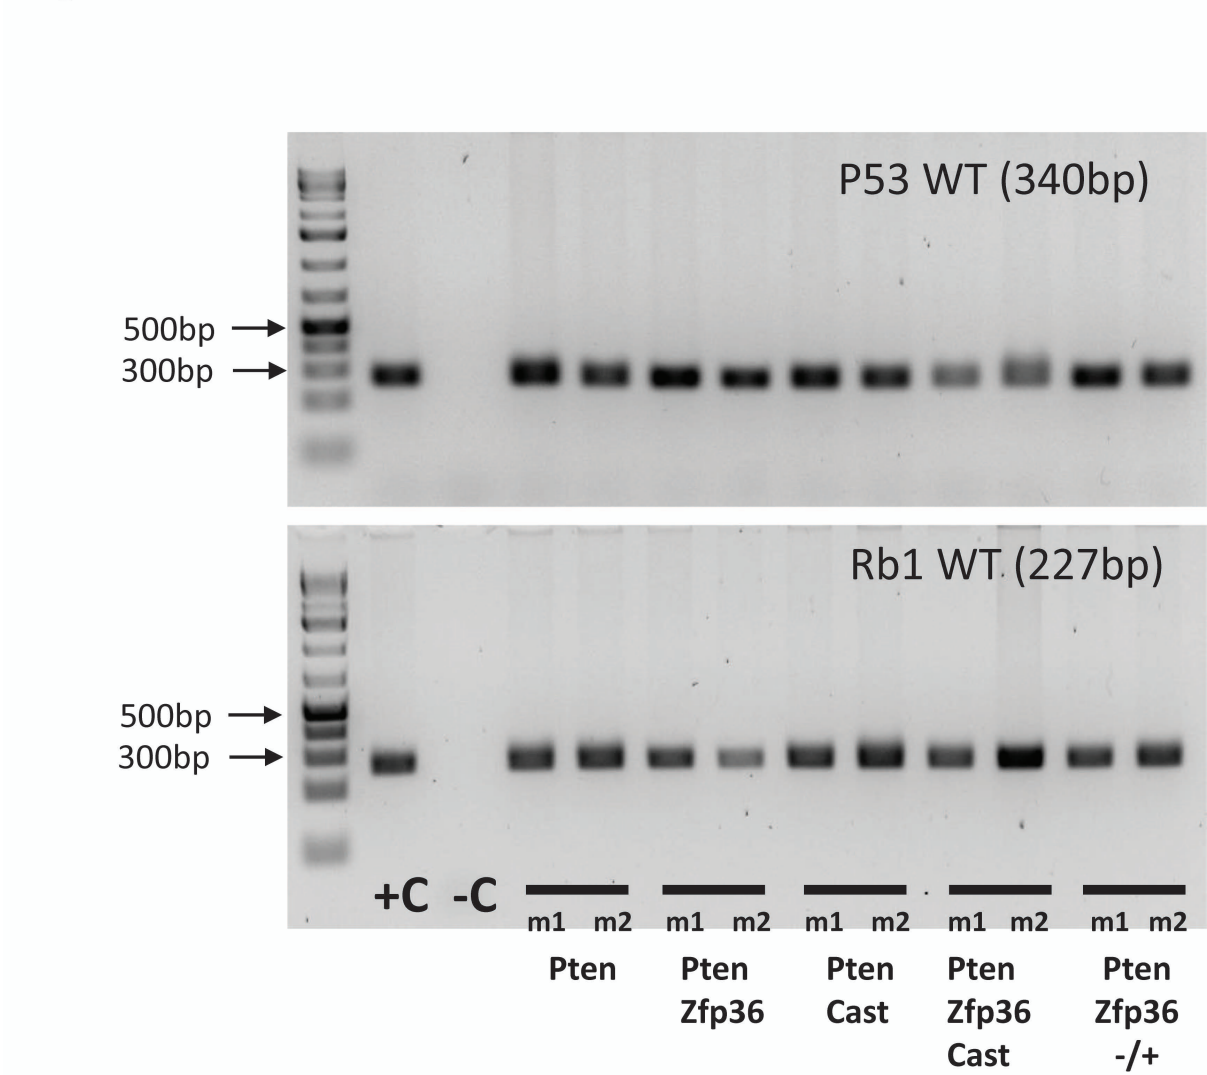

# Uncropped gel and blots

## Figure S8A

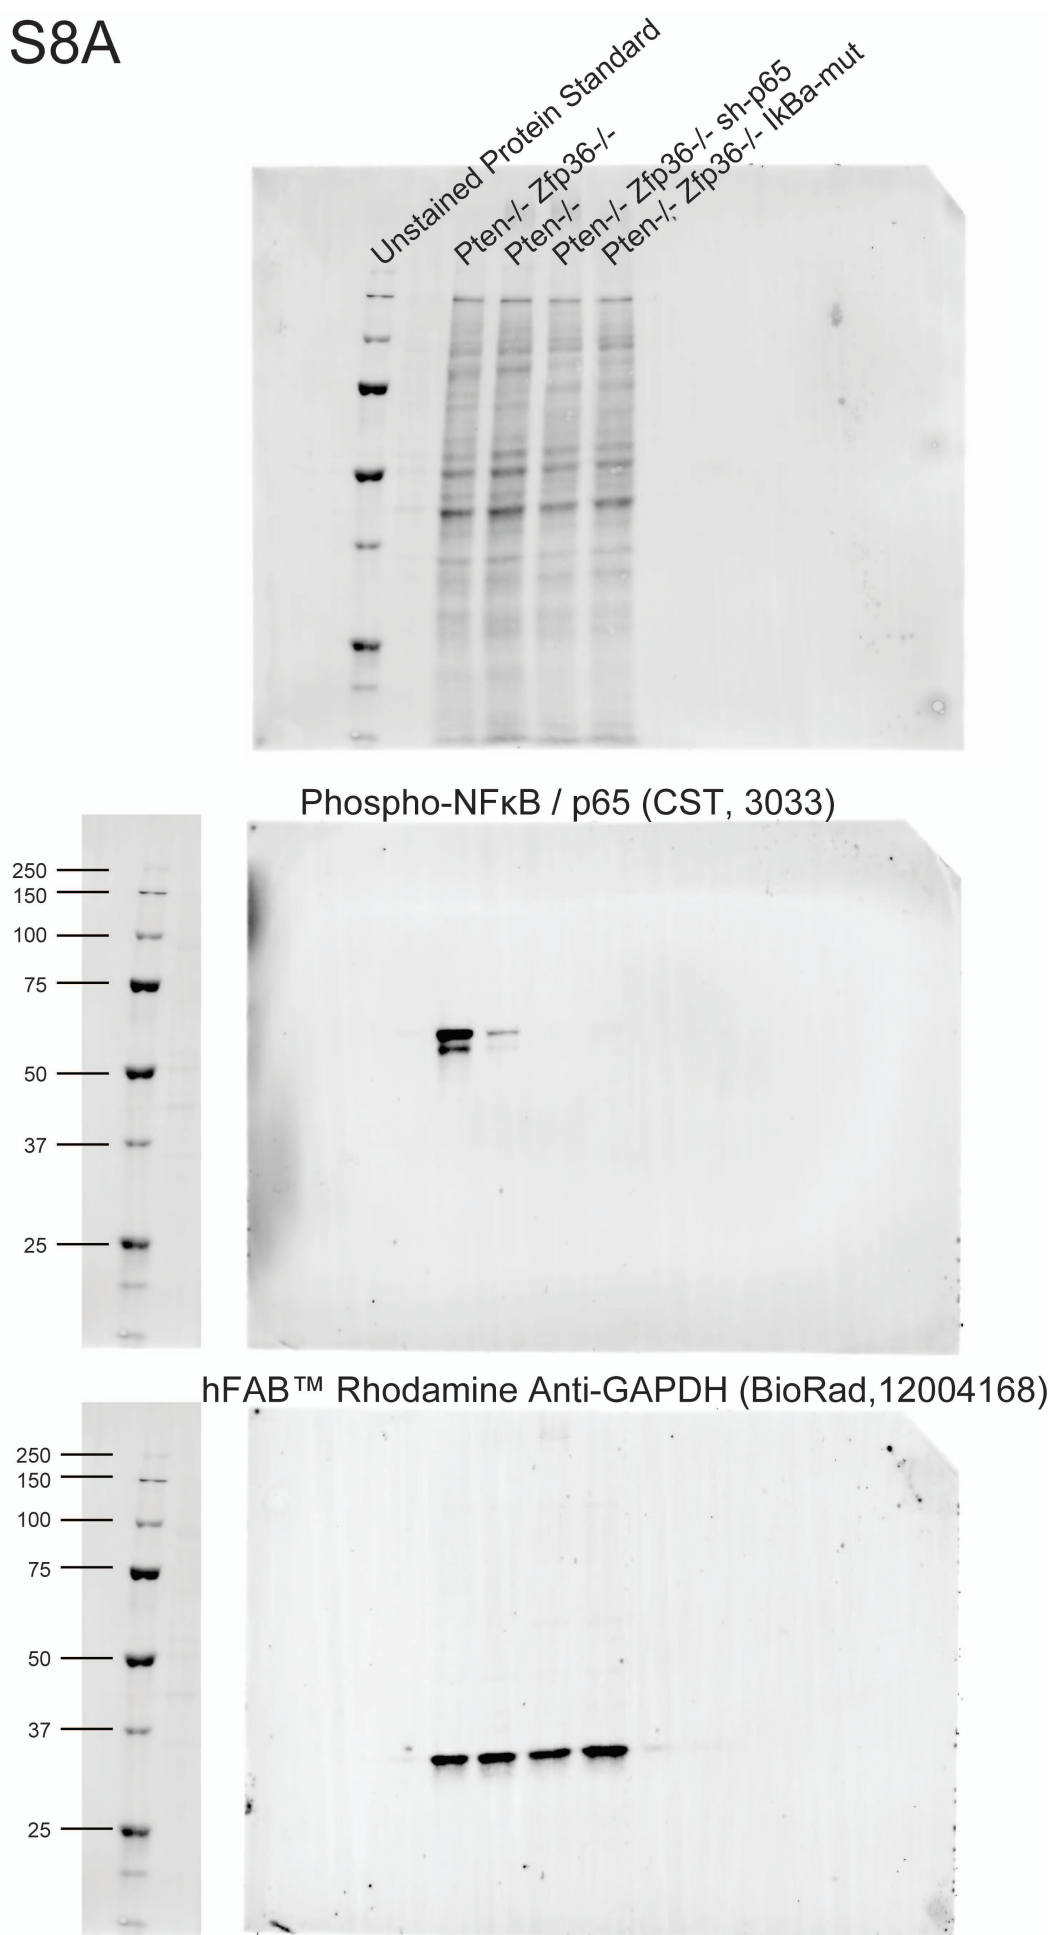

Supplement: sd2 [file 2]
